# Supplementary material for: In vivo measurement of trabecular meshwork stiffness in a corticosteroid-induced ocular hypertensive mouse model
Source: PubMed Central journal article supplement — Proc Natl Acad Sci U S A. 2019 Jan 16;116(5):1714–22. doi: 10.1073/pnas.1814889116 (PMC6358695; doi:10.1073/pnas.1814889116), 2019-01-16
Supplement: pnas.1814889116.sapp.pdf [file pnas.1814889116.sapp.pdf]

## Supplementary Information for

### **In vivo measurement of trabecular meshwork stiffness in a novel, corticosteroid-induced ocular hypertensive mouse model**

Guorong Li<sup>1</sup>, Chanyoung Lee<sup>2</sup>, Vibhuti Agrahari<sup>3</sup>, Ke Wang<sup>2</sup>, Iris Navarro<sup>1</sup>, Joseph M. Sherwood<sup>4</sup>, Karen Crews<sup>5</sup>, Sina Farsiu<sup>1,6</sup>, Pedro Gonzalez<sup>1</sup>, Cheng-Wen Lin<sup>5</sup>, Ashim K. Mitra<sup>7</sup>, C. Ross Ethier<sup>2\*</sup>, W. Daniel Stamer<sup>1,6\*</sup>

<sup>1</sup>Department of Ophthalmology, Duke University; <sup>2</sup>Department of Biomedical Engineering, Georgia Institute of Technology/Emory University; <sup>3</sup>Department of Biopharmaceutical Sciences, Bernard J Dunn School of Pharmacy, Shenandoah University, Winchester, VA; <sup>4</sup>Department of Bioengineering, Imperial College London; <sup>5</sup>Aerie Pharmaceuticals, Inc., Durham; <sup>6</sup>Department of Biomedical Engineering, Duke University; <sup>7</sup>School of Pharmacy, University of Missouri-Kansas City, Kansas City, United States

\*corresponding authors

W. Daniel Stamer, Ph.D.  
dan.stamer@duke.edu

C. Ross Ethier, Ph.D.  
ross.ethier@bme.gatech.edu

#### **This PDF file includes:**

Figs. S1 to S5  
Tables S1 to S3

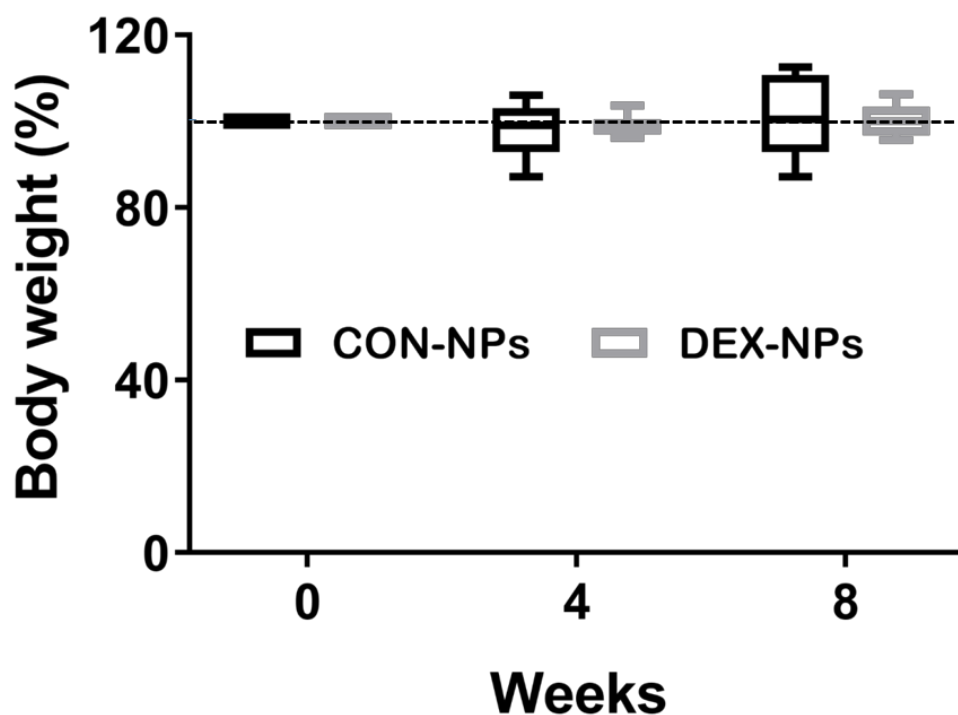

Fig. S1. **Body weight of mice treated with DEX-NPs or CON-NPs over time.** Two groups of 3 month-old C57BL/6 female mice were injected with identical amounts of CON-NPs or DEX-NPs (1 mg/20  $\mu$ l of particles containing no DEX or  $\sim$ 23  $\mu$ g of DEX, respectively) bilaterally once per week for eight weeks. Body weight was measured before treatment, and at 4 weeks and 8 weeks after the first injection. The quantity plotted on the Y-axis is body weight normalized to the value before treatments (N = 5-7). The data are displayed as box and whisker plots, with the box showing median, upper and lower quartiles and whiskers indicating highest and lowest observations. Dashed line indicates 100% of body weight before treatment.

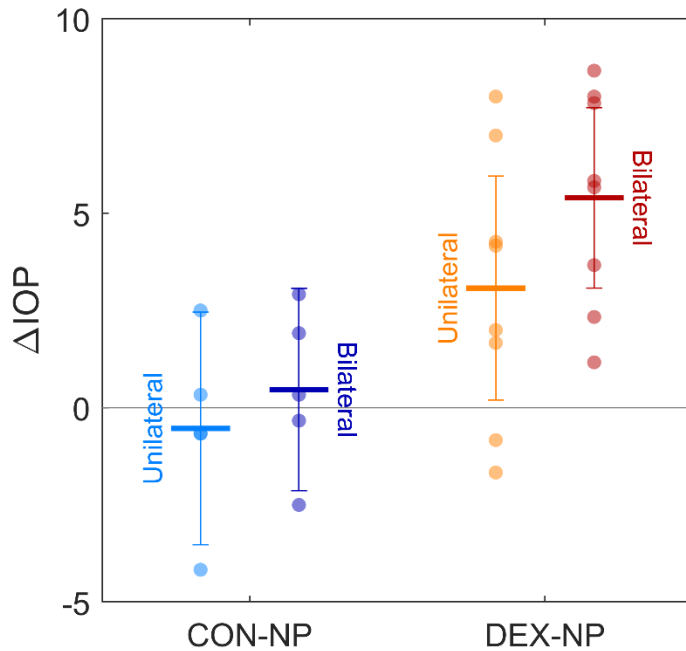

Fig. S2. **Effect of unilateral versus bilateral injections.** Two injections per month of DEX-NPs (N=8) or CON-NPs (N=5) were applied unilaterally, and compared to bilateral injections under the same conditions. Neither unilateral nor bilateral CON-NP injections resulted IOP elevation relative to baseline ( $\Delta$ IOP). For DEX-NPs, unilateral injections resulted in a smaller average IOP elevation 3.1 [0.2, 6.0] mmHg than bilateral injections 5.4 [3.1,7.7] mmHg, but the difference was not statistically significant ( $p = 0.16$ )

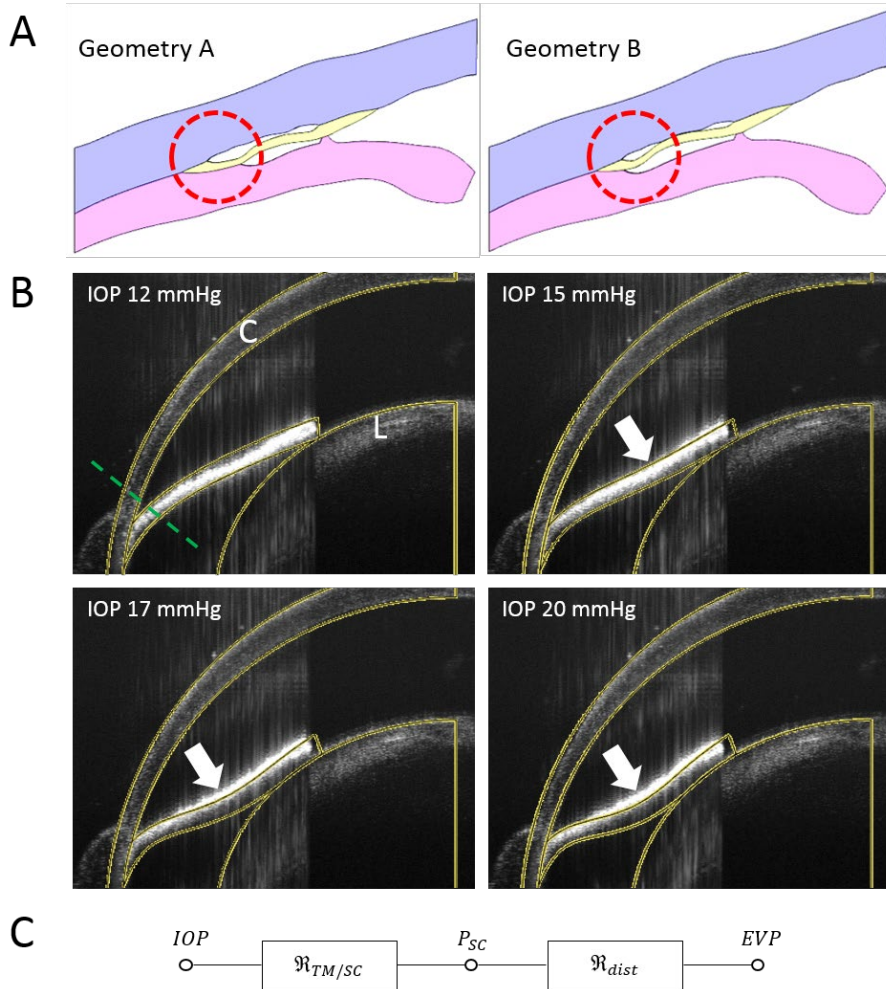

Fig. S3: **Details of finite element modeling.** (A) The specific anatomy of the iris-TM junction (red circles) influenced the extent and shape of SC collapse as predicted by FEM. For example, a more anteriorly-located iris-TM junction (Geometry A) led to minimal posterior SC collapse, in distinction to the situation with a more posteriorly-located iris-TM junction (Geometry B). Based on OCT imaging showing SC collapse both anteriorly and posteriorly, we chose Geometry B for all simulations presented herein. (B) OCT images of the anterior segment show that as the imposed IOP is increased, the iris (bright region) bows backwards (arrows) and the cornea-iris angle increases, which we took as evidence of formation of a lens-iris diaphragm and a pressure differential across the iris. C, cornea; L, lens. Yellow lines overlain on the OCT images show the iridial displacement predicted by a large-scale FEM, as described in the text. The green dashed line coincides with the right edge of the SC lumen-focused OCT image where effective shear/normal forces and moments were extracted and applied to the SC lumen-focused finite element model, as described in the text. (C) Equivalent electrical circuit representation of the conventional aqueous outflow pathway in mice, showing resistive elements (rectangles) and key pressures (nodes). See text for definition of symbols.

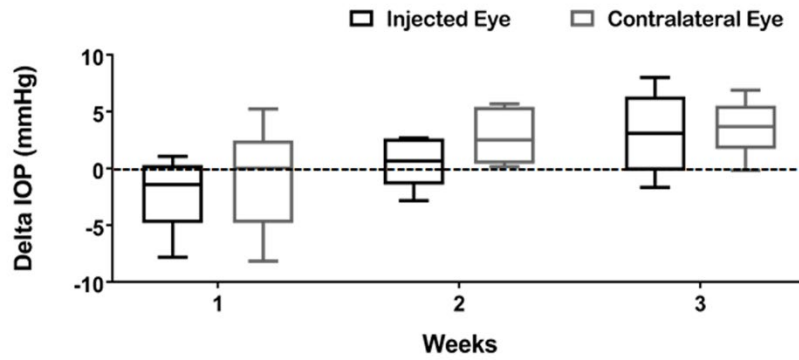

**Fig. S4. IOP elevation in contralateral eyes following unilateral DEX-NP injections.** Three month-old C57BL/6 male mice were injected with DEX-NPs (1 mg/20  $\mu$ l of particles containing  $\sim$ 23  $\mu$ g of DEX) into right eyes twice/month. IOPs were measured in both eyes. Data shows average IOP elevation from baseline readings at indicated time points on both eyes. N = 8 mice. The data are displayed as box and whisker plots, with the box showing median, upper and lower quartiles and whiskers indicating highest and lowest observations.

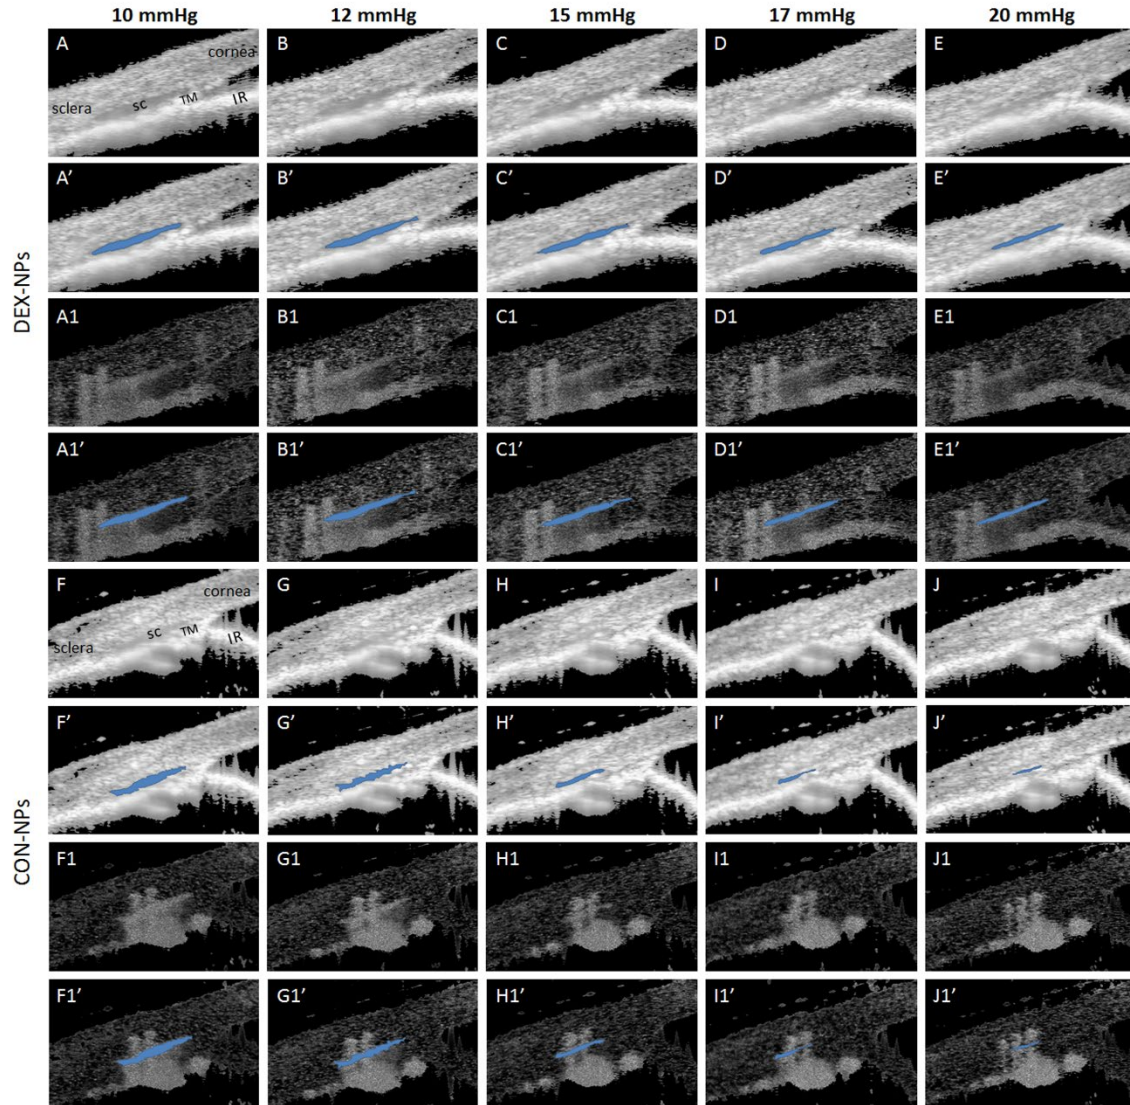

**Fig. S5. Changes in conventional outflow tissue behavior in living mice treated with DEX-NP and monitored by OCT.** Living DEX-NP- or CON-NP-injected mouse eyes were cannulated to control IOP, and were subjected to increasing pressure steps (10, 12, 15, 17 and 20 mm Hg) while imaging conventional outflow tissues in cross section by OCT. Representative averaged OCT images for a single DEX-NP-injected eye at the indicated IOP levels are shown in the top row. The third row shows speckle variance images from the same mouse eye as in the top row. The second and fourth rows show semi-automatic segmentation of Schlemm's canal lumen (blue) using SchlemmSeg software, overlaid on averaged and speckle variance images, respectively. A single mouse eye treated with CON-NPs is shown in rows 5-8 at different IOP levels, with the same pattern of display as described for DEX-NP eyes. SC, Schlemm's canal; TM, trabecular meshwork; IR, iris.

**Table S1.** Segmented cross-sectional area (pixels) of Schlemm’s canal lumen at clamped intraocular pressures (IOP, mmHg)

| <b>IOP</b>    | <b>10</b>     | <b>12</b>     | <b>15</b>     | <b>17</b>     | <b>20</b>    |
|---------------|---------------|---------------|---------------|---------------|--------------|
| <b>DEX-NP</b> |               |               |               |               |              |
| <b>1</b>      | 1952          | 1842          | 1552          | 979           | 851          |
| <b>2</b>      | 1822          | 1760          | 1599          | 1490          | 1153         |
| <b>3</b>      | 2222          | 2096          | 1712          | 1469          | 1210         |
| <b>4</b>      | 2121          | 1979          | 1641          | 1280          | 953          |
| <b>5</b>      | 2064          | 1878          | 1757          | 1568          | 1190         |
| <b>6</b>      | 1820          | 1405          | 1339          | 1102          | 589          |
| <b>7</b>      | 1985          | 1934          | 1476          | 1370          | 960          |
| <b>8</b>      | 1985          | 1888          | 1661          | 1481          | 1145         |
| <b>9</b>      | 1459          | 1382          | 1275          | 894           | 770          |
| <b>10</b>     | 1510          | 1398          | 1273          | 1068          | 859          |
| <b>mean</b>   | <b>1894</b>   | <b>1756.2</b> | <b>1528.5</b> | <b>1270.1</b> | <b>968</b>   |
| <b>SD</b>     | 235.6         | 250.6         | 170.2         | 229.5         | 195.5        |
| <b>CON-NP</b> |               |               |               |               |              |
| <b>1</b>      | 1882          | 1707          | 1148          | 596           | 286          |
| <b>2</b>      | 1019          | 818           | 683           | 393           | 165          |
| <b>3</b>      | 1884          | 1507          | n/a           | 736           | 389          |
| <b>4</b>      | 1030          | 838           | 718           | 360           | 155          |
| <b>5</b>      | 1028          | 926           | 689           | 512           | 245          |
| <b>6</b>      | 1999          | 1506          | 1392          | 1045          | 705          |
| <b>mean</b>   | <b>1473.7</b> | <b>1217</b>   | <b>926</b>    | <b>607</b>    | <b>324.2</b> |
| <b>SD</b>     | 492.6         | 398.8         | 325.9         | 254.7         | 205.4        |

DEX: dexamethasone, CON: control, NP: nanoparticles, n/a: not available, per manufacturer’s specifications, one pixel is approximately 1.15 $\mu\text{m}^2$

**Table S2.** Numbers of mice and eyes used for experiments

| <b>Measurements</b> | <b>CON-NPs treatment</b> | <b>DEX-NPs treatment</b> | <b>For figures</b> | <b>Condition</b> |
|---------------------|--------------------------|--------------------------|--------------------|------------------|
| <b>IOP</b>          | 28 mice, 51 eyes         | 37 mice, 66 eyes         | 1A, 1B, S2,S4      | In vivo          |
| <b>Facility</b>     | 12 mice, 23 eyes         | 13 mice, 25 eyes         | 1D                 | Ex vivo (globe)  |
| <b>DEX level</b>    | -                        | 12 mice, 12 eyes         | 1C                 | Ex vivo (globe)  |
| <b>Histology</b>    | 7 mice, 8 eyes           | 14 mice, 17 eyes         | 2                  | Tissue           |
| <b>OCT</b>          | 6 mice, 6 eyes           | 10 mice, 10 eyes         | 3, 4, S3           | In vivo          |
| <b>Body weight</b>  | 5 mice                   | 7 mice                   | S1                 | In vivo          |

IOP: intraocular pressure, OCT: optical coherence tomography, DEX: dexamethasone, CON: control, NP: nanoparticles



**Table S3.** Estimated pressures within SC lumen as a function of set (“clamped”) IOP levels

| Clamped IOP (mmHg) | Schlemm’s canal luminal pressure ( $P_{SC}$ mmHg) |        |
|--------------------|---------------------------------------------------|--------|
|                    | CON-NP                                            | DEX-NP |
| 10                 | 7.2                                               | 6.7    |
| 12                 | 8.0                                               | 7.3    |
| 15                 | 9.2                                               | 8.1    |
| 17                 | 10.0                                              | 8.7    |
| 20                 | 11.2                                              | 9.6    |

IOP: intraocular pressure, DEX: dexamethasone, CON: control, NP: nanoparticles
